# Supplementary material for: Developing a Comprehensive Selection Framework for Centralized Pharmaceutical Procurement Based on a Hybrid Multi-Criteria Decision-Making Approach
Source: Research Square preprint supplement (doi:10.21203/rs.3.rs-6849760/v1), 2025-07-17
Supplement: Supplementary file 1 [file 2d8b3cc78cf37382708642c7.docx]

**Supplementary Material**

Supplemental Method 1: Complete Delphi Survey Questionnaire (Rounds 1 and 2)

Instruction

Thank you for agreeing to participate in this Delphi study. We greatly appreciate the time and effort you are dedicating to completing this survey. You have been invited due to your expertise and significant involvement in drug assessment within the Chinese healthcare system.

This study aims to develop a framework for selecting medications in centralized procurement processes at healthcare institutions, with a focus on the value-based perspective of pharmaceuticals to provide robust evaluative criteria for procurement decision-making. Through a Delphi study, we aim to achieve consensus among stakeholders regarding the key indicators considered essential for medication selection decisions at the institutional level.

The study will consist of a two-round survey process. Following each round, anonymized results will be aggregated, and detailed feedback will be provided to participants. The first round seeks to comprehensively identify all critical domains and indicators relevant to the procurement of centrally procured drug varieties. Based on the feedback from the first round, the second round will refine and prioritize the indicator system to establish the final medication selection framework.

Consent to participate

By commencing the survey, you are providing consent to participate in this study as detailed in the participant information sheet provided below and agreeing to the following points.

- I voluntarily provide my consent to participate in this research study.
- I confirm that I have read the information statement and fully understand its contents.
- I acknowledge the procedures required for participation in this project and confirm my right to withdraw at any time without penalty or prejudice.
- I have had the opportunity to ask questions about the project and am fully satisfied with the responses received.
- I confirm that this project has been approved by the Ethics Committee of the First Affiliated Hospital of Zhengzhou University.

Round 1 consists of two parts

**Part 1:** Comprises 12 dimensions along with their corresponding 36 indicators. You are required to provide an agreement assessment for each indicator (1 = Strongly disagree, 2 = Disagree, 3 = Neutral, 4 = Agree, 5 = Strongly agree).

**Part 2:** Asks whether you would recommend any modifications to the existing dimensions and/or propose additional dimensions for inclusion.

PART 1: Identifying Evaluation Indicators

*Please look at the following selection and evaluation indicators for centralized procurement varieties and rate your acceptance level.*

| **Dimension** | **Indicator** | **Description** | **Degree of agreement (1~5)** |
| --- | --- | --- | --- |
| Clinical necessity | Conform to the epidemiological characteristics of the disease | The evaluated drug has a target population with specific clinical indications within this hospital. |  |
| Clinical utilization rate of drugs | The evaluated drug was previously utilized within this hospital. |  |
| Medicines for rare diseases | The evaluated drug is included in the rare disease catalogue. |  |
| Medication for Special Populations | The evaluated drug is appropriate for use in special populations, including children, the elderly, pregnant individuals, etc. |  |
| Health benefits | Recommendation levels and strengths of the guidelines | Usually presented as ‘1A,1B,2A,3C, …’. |  |
| Efficacy evidence and level | At which level of evidence is the evaluated drug represented (guidelines, expert consensus, systematic reviews, RCTs, etc.). |  |
| Clinical pathway | Whether the evaluated drug is incorporated into this hospital’s clinical pathway. |  |
| Safety | The incidence and severity of adverse events | The incidence rate and degree of severity of adverse events associated with the evaluated drug in clinical application. |  |
| Hierarchy of safety evidence | Categorized into several levels, including high, medium, low, etc. |  |
| The contraindications and potential drug interactions as outlined in the product labeling | The contraindications and potential drug interactions as outlined in the product labeling. |  |
| The total count of pharmacovigilance alerts or communications issued | The number of times the drug under review has been notified. |  |
| Economic impact | Compared with the costs of currently listed drugs within this hospital's formulary | The unit procurement cost of the evaluated drug, in comparison to drugs with the same generic name, dosage form, and specification within this region. |  |
| Cost-effectiveness | Cost-effectiveness evidence. |  |
| Out-of-pocket costs to patients | The out-of-pocket expenses of the patient. |  |
| Budget impact to payer | Results of budget impact analysis. |  |
| Clinical applicability | Dosage Regimen, Administration Method, and Treatment Duration | Dosage Regimen, Administration Method, and Treatment Duration. |  |
| Route of administration | Route of administration. |  |
| Drug quality | Status of Consistency Evaluation | Whether the evaluated drug has passed the consistency evaluation. |  |
| Validity period description | Whether the evaluated drug has a history of notifications related to its expiration date description. |  |
| Quality certification issued to the manufacturing enterprise | The product credibility of the evaluated pharmaceutical manufacturing enterprises. |  |
| Quality standards | Quality standards. |  |
| Irreplaceability | The overview of other drugs in the current catalogue | The overview of other drugs in the current catalogue. |  |
| The advantages of alternatives | The advantages of alternatives. |  |
| The substitutability of existing varieties | The substitutability of existing varieties. |  |
| Policy attributes | Essential medicines | The evaluated drug is an essential medicine. |  |
| Category of medical insurance | The medical insurance type of the evaluated drug. |  |
| Under the national centralized procurement program | The evaluated drug is included in the National Centralized Procurement List (NCPL). |  |
| Classification of antimicrobial agents | The evaluated drug is an antibacterial agent. |  |
| Special management attributes such as psychotropic substances and precursors | The evaluated drug is classified as a specially controlled pharmaceutical. |  |
| Accessibility | Supply assurance commitment letter of the evaluated drug | Supply assurance commitment letter of the evaluated drug. |  |
| Procurement tracking records | Procurement tracking records. |  |
| Fairness | Included in the essential medicines list | The evaluated drugs are listed in the National Reimbursement Drug list (NRDL). |  |
| Included in the medical insurance catalog | The evaluated drugs are listed in the National Essential Medicines list (NEML). |  |
| Within the scope of the centralized procurement policy | The evaluated drugs are included in other formularies. |  |
| Severity of disease | Severity of disease | The severity of the patient's disease. |  |
| Organization impact | Impact on the health system, healthcare facilities, and healthcare providers | Impact on the health system, healthcare facilities, and healthcare providers. |  |

PART 2: Modifications to and/or additional dimensions

*Please consider the dimensions listed in the survey*

| 1. If you have any suggestions for modifications to the dimensions, please indicate them below. Otherwise, you may leave the fields blank.  🞄 Clinical necessity  🞄 Health benefits  🞄 Safety  🞄 Economic impact  🞄 Clinical applicability  🞄 Drug quality  🞄 Irreplaceability  🞄 Policy attributes  🞄 Accessibility  🞄 Fairness  🞄 Severity of disease  🞄 Organization impact |
| --- |
| 2. Are there any additional dimensions that you deem crucial to the decision-making process for drug selection in centralized procurement? |

Round 2

Introduction

Welcome to Round 2. We sincerely appreciate your valuable contribution. Round 2 integrates the results from Round 1 and has been refined based on your feedback. We would now like to inquire whether you consider further refinement.

| **Dimension** | **Indicator** | **Description** | **Modification (if required)** |
| --- | --- | --- | --- |
| Clinical necessity | Individuals with clinical indications | The evaluated drug has a target population with specific clinical indications within this hospital. |  |
| Historical clinical usage rate | The evaluated drug was previously utilized within this hospital. |  |
| Shortage | The evaluated drug is included in the Shortage Drug List. |  |
| Health benefits | Clinical pathway | Whether the evaluated drug is incorporated into this hospital’s clinical pathway. |  |
| Efficacy evidence and level | At which level of evidence is the evaluated drug represented (guidelines, expert consensus, systematic reviews, RCTs, etc.). |  |
| Compliance | The compliance of the evaluated drug (e.g., the selection of common dosage forms and specifications). |  |
| Usage record | The duration of use of the evaluated drug within this hospital (including whether it has been purchased annually). |  |
| Safety | Adverse events | The incidence rate and degree of severity of adverse events associated with the evaluated drug in clinical application. |  |
| Economic impact | Unit procurement cost | The unit procurement cost of the evaluated drug, in comparison to drugs with the same generic name, dosage form, and specification within this region. |  |
| Drug quality | Status of Consistency Evaluation | The status of the evaluated drugs in passing the consistency assessment. |  |
| Quality certification | The product credibility of the evaluated pharmaceutical manufacturing enterprises. |  |
| Validity period description | Whether the evaluated drug has a history of notifications related to its expiration date description. |  |
| Accessibility | Supply assurance | Supply assurance commitment letter of the evaluated drug. |  |
| Irreplaceability | In comparison to drugs of the same category within the existing catalogue | The comparative analyses were structured around the following categories.  a) Drugs with identical generic names but manufactured by different entities;  b) Drugs sharing the same generic names yet differing in salt forms or counterions;  c) Agents with pharmacological equivalence but distinct generic nomenclature;  d) Therapeutic altematives with differing generic names but targeting the same clinical indications. |  |
| Fairness | The evaluated drugs are encompassed within multiple healthcare coverage formularies | The evaluated drugs are listed in the National Reimbursement Drug list (NRDL). |  |
| The evaluated drugs are listed in the National Essential Medicines list (NEML). |  |
| The evaluated drugs are included in other formularies. |  |

Supplemental Table 1: Results of the first round of the Delphi

| **Dimension** | **Indicator** | **The approval rate (%); reason** |
| --- | --- | --- |
| Clinical necessity | Conform to the epidemiological characteristics of the disease | 87; need modify |
| Clinical utilization rate of drugs | 85.8; need modify |
| Medicines for rare diseases | 66.7; not applicable |
| Medication for Special Populations | 63.5; not applicable |
| Health benefits | Recommendation levels and strengths of the guidelines | 58; repetition |
| Efficacy evidence and level | 100 |
| Clinical pathway | 96 |
| Safety | The incidence and severity of adverse events | 88; need modify |
| Hierarchy of safety evidence | 75; repetition |
| The contraindications and potential drug interactions as outlined in the product labeling | 58.4; repetition |
| The total count of pharmacovigilance alerts or communications issued | 62.1; repetition |
| Economic impact | Compared with the costs of currently listed drugs within this hospital's formulary | 96.3; need modify |
| Cost-effectiveness | 83.5; not applicable |
| Out-of-pocket costs to patients | 66.7; not applicable |
| Budget impact to payer | 73.8; not applicable |
| Clinical applicability | Dosage Regimen, Administration Method, and Treatment Duration | 51.2; repetition |
| Route of administration | 48.9; repetition |
| Drug quality | Status of Consistency Evaluation | 97.6; need modify |
| Validity period description | 99.5; need modify |
| Quality certification issued to the manufacturing enterprise | 93.4; need modify |
| Quality standards | 75.2; repetition |
| Irreplaceability | The overview of other drugs in the current catalogue | 86.7; need modify |
| The advantages of alternatives | 70.3; not applicable |
| The substitutability of existing varieties | 58.6; not applicable |
| Policy attributes | Essential medicines | 28.4; repetition |
| Category of medical insurance | 34.7; repetition |
| Under the national centralized procurement program | 29.3; repetition |
| Classification of antimicrobial agents | 78.6; not applicable |
| Special management attributes such as psychotropic substances and precursors | 74.8; not applicable |
| Accessibility | Supply assurance commitment letter of the evaluated drug | 97.6 |
| Procurement tracking records | 65.2; repetition |
| Fairness | Included in the essential medicines list | 98.5 |
| Included in the medical insurance catalog | 100 |
| Within the scope of the centralized procurement policy | 100 |
| Severity of disease | Severity of disease | 45.2; repetition |
| Organization impact | Impact on the health system, healthcare facilities, and healthcare providers | 35.2; repetition |

Supplemental Table 2: Results of the second round of the Delphi

| **Dimension** | **Indicator** | **The approval rate (%)** |
| --- | --- | --- |
| Clinical necessity | Individuals with clinical indications | 99.6 |
| Historical clinical usage rate | 94.4 |
| Shortage | 98.8 |
| Health benefits | Clinical pathway | 88.8 |
| Efficacy evidence and level | 100 |
| Compliance | 89.9 |
| Usage record | 96.8 |
| Safety | Adverse events | 100 |
| Economic impact | Unit procurement cost | 100 |
| Drug quality | Status of Consistency Evaluation | 100 |
| Quality certification | 89.3 |
| Validity period description | 85.3 |
| Accessibility | Supply assurance | 93.5 |
| Irreplaceability | In comparison to drugs of the same category within the existing catalogue | 97.8 |
| Fairness | The evaluated drugs are encompassed within multiple healthcare coverage formularies | 100 |

Supplemental Table 3: Results of the consistency test in the Delphi method

| Rounds | Number of indicators | Kendall's coefficient W | Chi-square value | p value |
| --- | --- | --- | --- | --- |
| 1 | 36 | 0.042 | 15.61 | 0.552 |
| 2 | 15 | 0.208 | 56.82 | 0.006 |
